# Supplementary material for: Schizophrenic poly(ε-caprolactone)s: synthesis, self-assembly and fluorescent decoration
Source: Royal Society of Chemistry journal article supplement (doi:10.1039/c7py00461c), 2017-01-01
Supplement: c7py00461c1.pdf [file c7py00461c1.pdf]

## Supporting Information

### **Schizophrenic poly( $\epsilon$ -caprolactone)s: synthesis, self-assembly and fluorescent decoration**

Jun Zhang,<sup>a</sup> Yan Xiao,<sup>\*a</sup> Xueli Luo,<sup>a</sup> Lianlei Wen,<sup>a</sup> Andreas Herise<sup>b</sup> and Meidong Lang<sup>\*a</sup>

<sup>a</sup> Shanghai Key Laboratory of Advanced Polymeric Materials, Key Laboratory for Ultrafine Materials of Ministry of Education, School of Materials Science and Engineering, East China University of Science and Technology, Shanghai 200237, China.

<sup>b</sup> Department of Pharmaceutical & Medicinal Chemistry, Royal College of Surgeons in Ireland, 123 St. Stephen's Green, Dublin 2, Ireland.

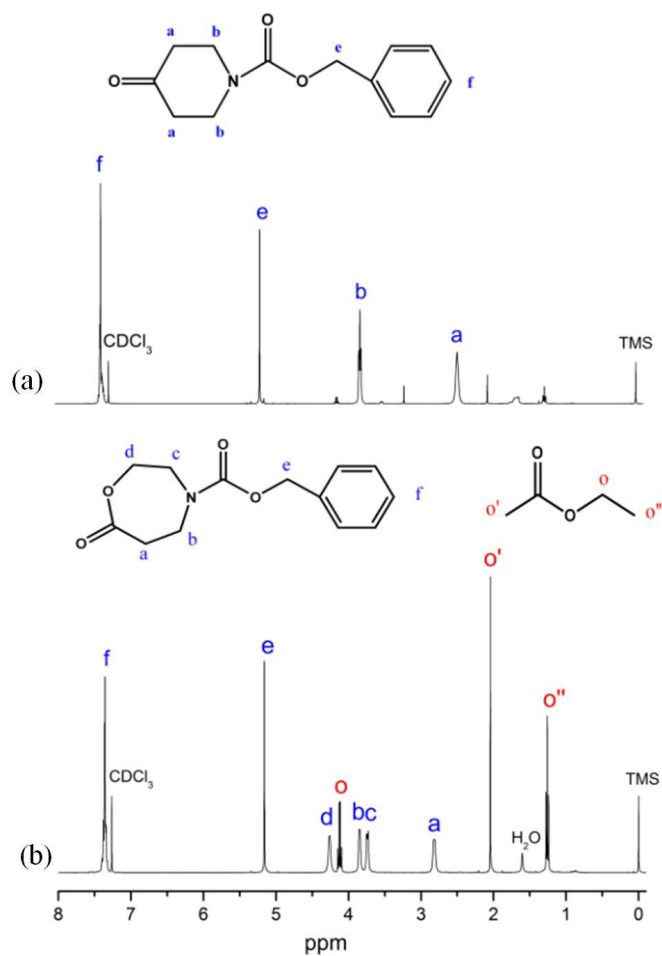

**Fig. S1** <sup>1</sup>H NMR spectra of (a) 4-*N*-benzyl formate-piperidone and (b) 4-*N*-benzyl formate-piperilactone (NPIL) in CDCl<sub>3</sub>.

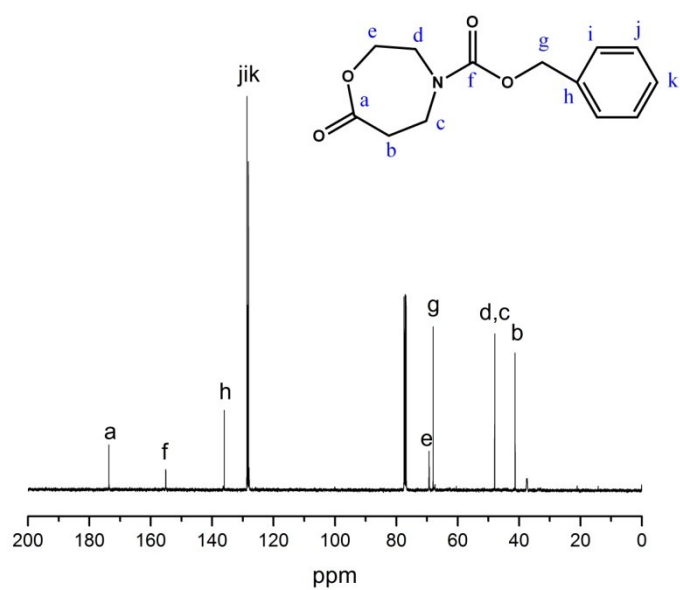

**Fig. S2** <sup>13</sup>C NMR spectrum of monomer NPIL.

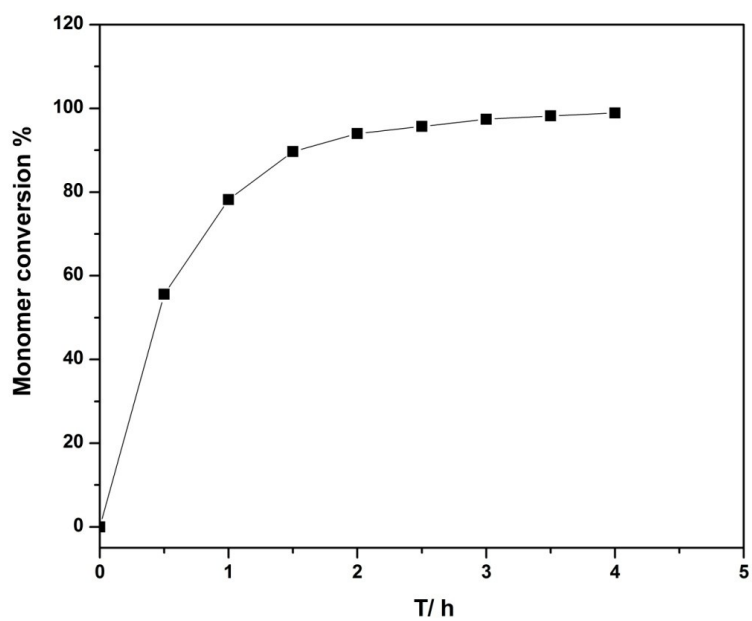

**Fig. S3** Conversion vs time for the ring-opening polymerization of the cyclic lactone NPIL.

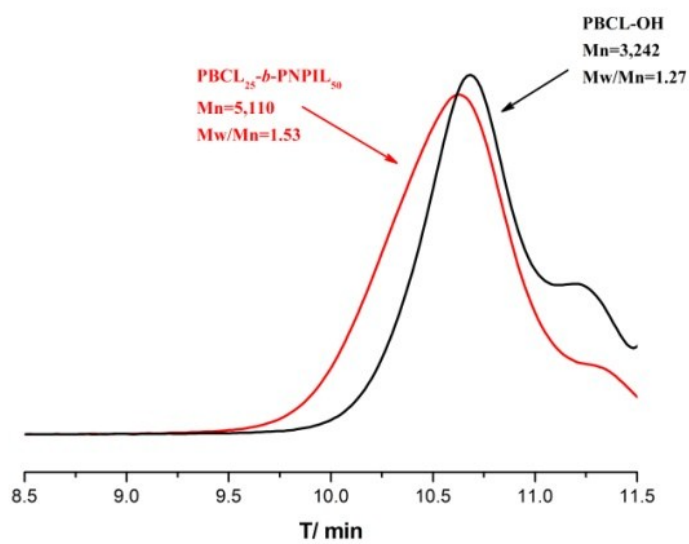

**Fig. S4** SEC traces of macro-initiator PBCL<sub>25</sub> and copolymer PBCL<sub>25</sub>-*b*-PNPIL<sub>50</sub>.

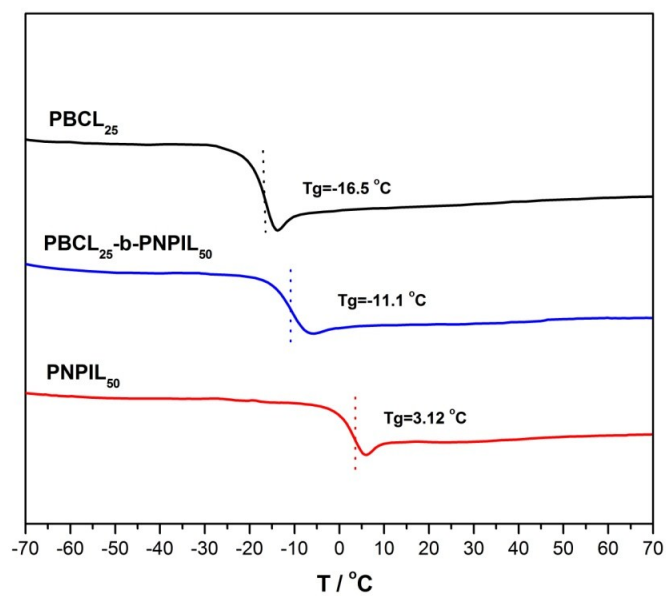

**Fig. S5** DSC curves of homopolymer PBCL<sub>25</sub>, PNPIL<sub>50</sub> and block copolymer PBCL<sub>25</sub>-*b*-PNPIL<sub>50</sub>.

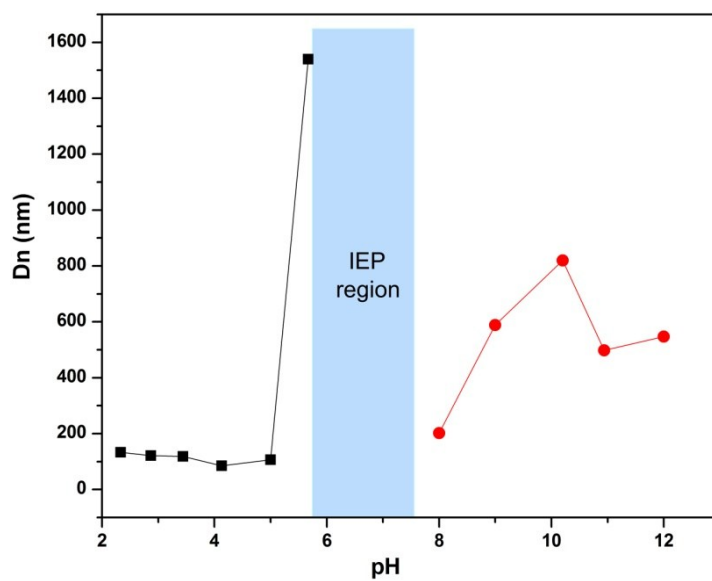

**Fig. S6** The hydrodynamic diameter of PCCL<sub>25</sub>-*b*-PPIL<sub>50</sub> at different pHs. Sample concentration was 0.5 mg/mL.

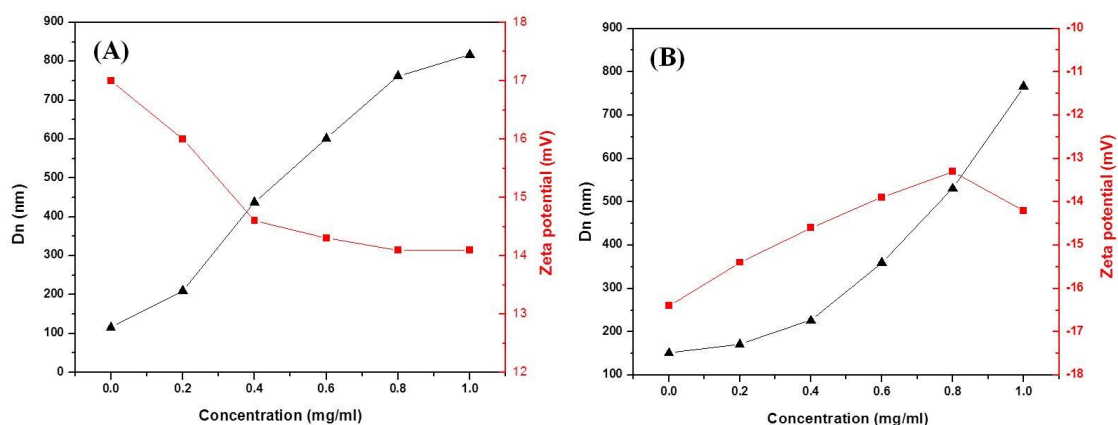

**Fig. S7** The hydrodynamic diameter and zeta potential of PCCL<sub>25</sub>-b-PPIL<sub>50</sub> copolymer (0.5 mg/mL) in NaCl aqueous solution with different salt concentrations. (A) at pH 5, (B) at pH 8, respectively.

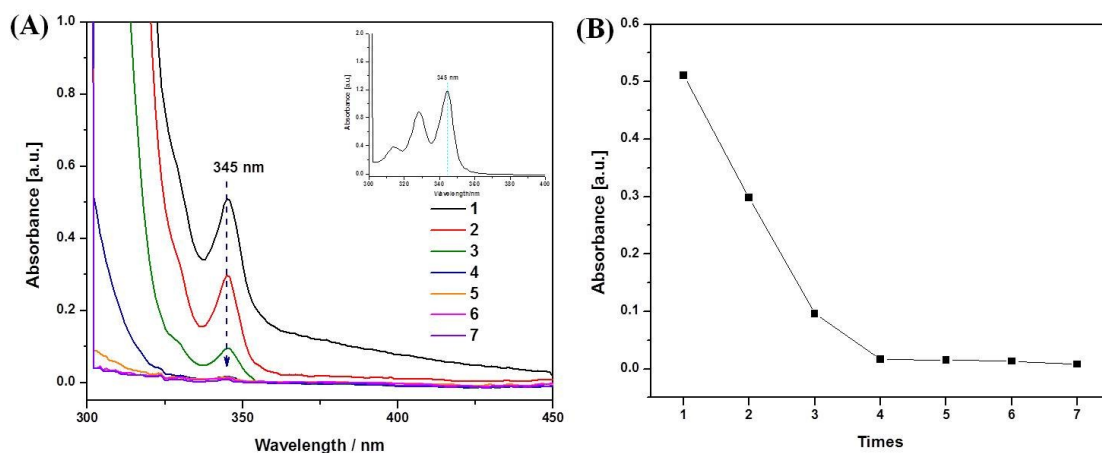

**Fig. S8** (A) UV-vis absorption spectra of 1-(hydroxymethyl)pyrene in precipitated solution as a function of precipitation times and (B) the absorbance at 345 nm of pyrene derivatives in each precipitation time. The inset in (A) shows UV-vis absorption spectrum of free 1-(hydroxymethyl)pyrene in diethyl ether at 0.001 mg/mL.

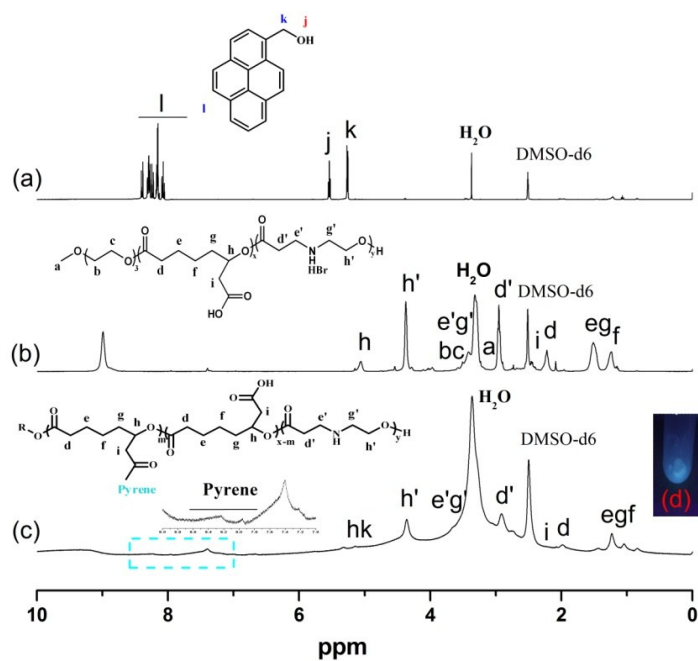

**Fig. S9**  $^1\text{H}$  NMR spectra of (a) 1-(hydroxymethyl)pyrene, (b)  $\text{PCCL}_{25}\text{-}b\text{-PPIL}_{50}$  and (c)  $\text{PCCL}_{25}\text{-}b\text{-PPIL}_{50}\text{-}g\text{-Py}$  in  $\text{DMSO-d}_6$ . The inset in (d) shows photograph of the partial sample for pyrene-labeled copolymer under UV irradiation (365 nm).

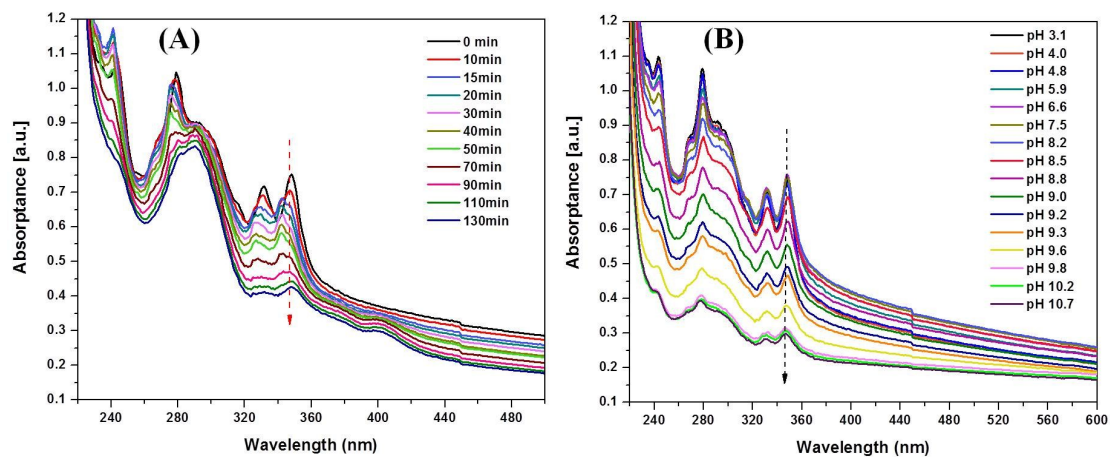

**Fig. S10** UV-vis absorption spectra of pyrene-labeled copolymer aqueous solution (0.1 mg/mL) (A) UV irradiation (365 nm) for different time and (B) at different pHs.

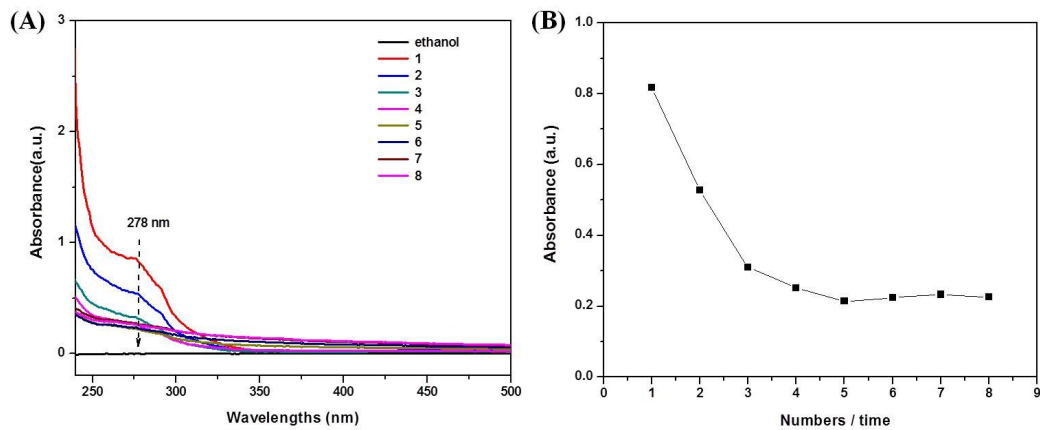

**Fig. S11** (A) UV-vis absorption spectra of FITC in ethanol as a function of washing times and (B) the absorbance at 278 nm of FITC in each washing time.

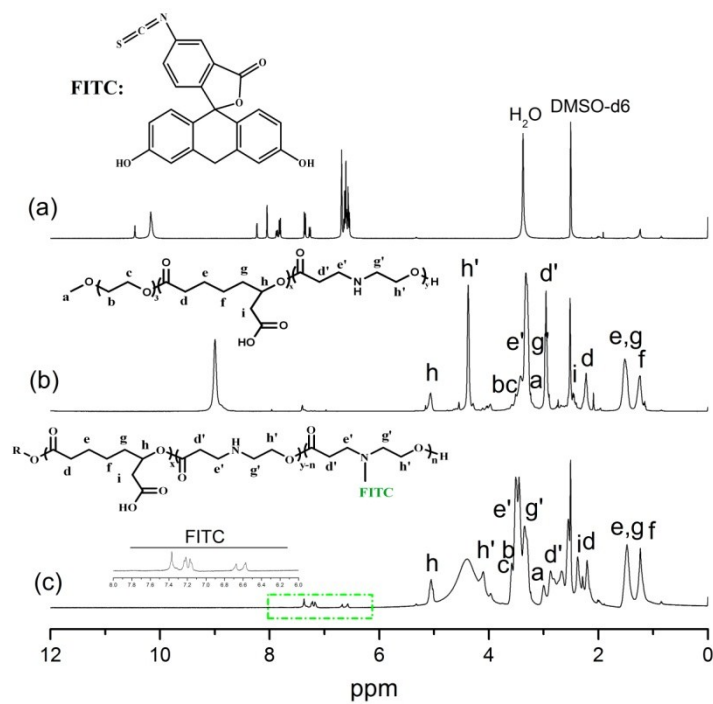

**Fig. S12**  $^1\text{H}$  NMR spectra of (a) FITC, (b)  $\text{PCCL}_{25}\text{-}b\text{-PPIL}_{50}$  and (c)  $\text{PCCL}_{25}\text{-}b\text{-PPIL}_{50}\text{-}g\text{-FITC}$  in  $\text{DMSO-d}_6$ .
